# 1 **New Asgard archaea capable of anaerobic hydrocarbon cycling**

2 **Kiley W. Seitz<sup>1</sup>, Nina Dombrowski<sup>1,3</sup>, Laura Eme<sup>2</sup>, Anja Spang<sup>2,3</sup>, Jonathan Lombard<sup>2</sup>, Jessica R. Sieber<sup>4</sup>,**

3 **Andreas P. Teske<sup>5</sup>, Thijs J.G. Ettema<sup>2</sup>, and Brett J. Baker<sup>1\*</sup>**

4 1. Department of Marine Science, University of Texas Austin, Port Aransas, TX 78373 2. Uppsala University,  
5 Uppsala Sweden 3. NIOZ, Royal Netherlands Institute for Sea Research, and Utrecht University, The  
6 Netherlands 4. University Minnesota Duluth, MN 5. Department of Marine Sciences, University of North  
7 Carolina, Chapel Hill, NC \*Corresponding author

8  
9

10 **Large reservoirs of natural gas in the oceanic subsurface sustain a complex biosphere of**  
11 **anaerobic microbes, including recently characterized archaeal lineages that extend the**  
12 **potential to mediate hydrocarbon oxidation (methane and butane) beyond the**  
13 **Methanomicrobia. Here we describe a new archaeal phylum, Helarchaeota, belonging to the**  
14 **Asgard superphylum with the potential for hydrocarbon oxidation. We reconstructed**  
15 **Helarchaeota genomes from hydrothermal deep-sea sediment metagenomes in hydrocarbon-**  
16 **rich Guaymas Basin, and show that these encode novel methyl-CoM reductase-like enzymes**  
17 **that are similar to those found in butane-oxidizing archaea. Based on these results as well as**  
18 **the presence of several alkyl-CoA oxidation and Wood-Ljungdahl pathway genes in the**  
19 **Helarchaeota genomes, we suggest that members of the Helarchaeota have the potential to**  
20 **activate and subsequently anaerobically oxidize short-chain hydrocarbons. These findings link**  
21 **a new phylum of Asgard archaea to the microbial utilization of hydrothermally generated**  
22 **hydrocarbons, and extend this genomic blueprint further through the archaeal domain.**

23

24

25 Short-chain alkanes, such as methane and butane, are abundant in marine sediments and play  
26 an important role in carbon cycling with methane concentrations of ~1 Gt being processed  
27 globally through anoxic microbial communities<sup>1-3</sup>. Until recently, archaeal methane cycling was  
28 thought to be limited to Euryarchaeota<sup>4</sup>. However, additional archaeal phyla, including  
29 Bathyarchaeota<sup>5</sup> and Verstraetarchaeota<sup>6</sup>, have been shown to contain proteins with homology  
30 to the activating enzyme methyl-coenzyme M reductase (Mcr) and corresponding pathways for  
31 methane utilization. Furthermore, new lineages within the Euryarchaeota belonging to  
32 *Candidatus* Syntrophoarchaeum spp., have been shown to use methyl-CoM reductase-like  
33 enzymes for anaerobic butane oxidation<sup>7</sup>. Similar to methane oxidation in many ANME-1 archaea,  
34 butane oxidation in Syntrophoarchaeum is proposed to be enabled through a syntrophic  
35 interaction with sulfur reducing bacteria<sup>7</sup>. Metagenomic reconstructions of genomes recovered  
36 from deep-sea sediments from near 2000 m depth in Guaymas Basin (GB) in the Gulf of California  
37 have revealed the presence of additional uncharacterized alkyl methyl-CoM reductase-like  
38 enzymes in metagenome-assembled genomes within the Methanosarcinales (Gom-Arc1)<sup>8</sup>. GB is  
39 characterized by hydrothermal alterations that transform large amounts of organic carbon into  
40 methane, polycyclic aromatic hydrocarbons (PAHs), low-molecular weight alkanes and organic  
41 acids allowing for diverse microbial communities to thrive (Supplementary Table 1)<sup>8-11</sup>.

42 Recently, genomes of novel clade of uncultured archaea, referred to as the Asgard  
43 superphylum that includes the closest archaeal relatives of eukaryotes, have been recovered  
44 from anoxic environments around the world<sup>12-14</sup>. Diversity surveys in anoxic marine sediments  
45 show that Asgard archaea appear to be globally distributed<sup>9,11,12,13</sup>. Based on phylogenomic  
46 analyses, Asgard archaea have been divided into four distinct phyla: Lokiarchaeota,

47 Thorarchaeota, Odinararchaeota and Heimdallarchaeota, with the latter possibly representing the  
48 closest relatives of eukaryotes<sup>12</sup>. Supporting their close relationship to eukaryotes, Asgard  
49 archaea possess a wide repertoire of proteins previously thought to be unique to eukaryotes  
50 known as eukaryotic signature proteins (ESPs)<sup>17</sup>. These ESPs include homologs of eukaryotic  
51 proteins, which in eukaryotes are involved in ubiquitin-mediated protein recycling, vesicle  
52 formation and trafficking, endosomal sorting complexes required for transport (ESCRT)-mediated  
53 multivesicular body formation as well as cytokinetic abscission and cytoskeleton formation<sup>18</sup>.  
54 Asgard archaea have been suggested to possess heterotrophic lifestyles and are proposed to play  
55 a role in carbon degradation in sediments; however, several members of the Asgard archaea also  
56 have genes that code for a complete Wood-Ljungdahl pathway and are therefore interesting with  
57 regard to carbon cycling in sediments<sup>14,19</sup>.

58 Here we present the first evidence of metagenome assembled genomes (MAGs),  
59 recovered from Guaymas Basin deep-sea hydrothermal sediments, which represent a new  
60 Asgard phylum with the metabolic potential to perform anaerobic hydrocarbon degradation  
61 using a methyl-CoM reductase-like homolog.

62

## 63 **Results**

64 **Identification of Helarchaeota genomes from Guaymas Basin sediments.** We recently obtained  
65 over ~280 gigabases of sequencing data from 11 samples taken from various sites and depths at  
66 Guaymas Basin hydrothermal vent sediments<sup>20</sup>. *De novo* assembly and binning of metagenomic  
67 contigs resulted in the reconstruction of over 550 genomes (>50% complete)<sup>20</sup>. Within these  
68 genomes we detected a surprising diversity of archaea, including >20 phyla, which appear to

69 represent up to 50% of the total microbial community in some of these samples<sup>20</sup>. Preliminary  
70 phylogeny of the dataset using 37 concatenated ribosomal proteins revealed two draft genomic  
71 bins representing a new lineage in the Asgard archaea. These draft genomes, referred to as  
72 Hel\_GB\_A and Hel\_GB\_B, were re-assembled and re-binned resulting in final bins that were 82  
73 and 87% complete and had a bin size of 3.54 and 3.84 Mbp, respectively (Table 1). An in-depth  
74 phylogenetic analysis consisting of 56 concatenated ribosomal proteins was used to confirm the  
75 placement of these final bins form a distant sister-group with the Lokiarchaeota (Figure 1a).  
76 Hel\_GB\_A percent abundance ranged from  $3.41 \times 10^{-3}\%$  to  $8.59 \times 10^{-5}\%$  and relative abundance from 8.43  
77 to 0.212. Hel\_GB\_B percent abundance ranged from  $1.20 \times 10^{-3}\%$  to  $7.99 \times 10^{-5}\%$  and relative abundance  
78 from 3.41 to 0.22. For both Hel\_GB\_A and Hel\_GB\_B the highest abundance was seen at the site the  
79 genomes bins were recovered from. These numbers are comparable to other Asgard archaea isolated  
80 from these sites<sup>20</sup>. Hel\_GB\_A and Hel\_GB\_B had a mean GC content of 35.4% and 28%, respectively,  
81 and were recovered from two distinct environmental samples, which share similar methane-  
82 supersaturated and strongly reducing geochemical conditions (concentrations of methane  
83 ranging from 2.3-3 mM, dissolved inorganic carbon ranging from 10.2-16.6 mM, sulfate near 21  
84 mM and sulfide near 2 mM; Supplementary Table 1) but differed in temperature (28°C and 10°C,  
85 respectively, Supplementary Table 1)<sup>19</sup>.

86 Phylogenetic analyses of a 16S rRNA gene sequence (1058 bp in length) belonging to  
87 Hel\_GB\_A confirmed that they are related to Lokiarchaeota and Thorarchaeota, but are  
88 phylogenetically distinct from either of these lineages (Figure 1b). A comparison to published  
89 Asgard archaeal 16S rRNA gene sequences indicate a phylum level division between the  
90 Hel\_GB\_A sequence and other Asgard archaea<sup>22</sup> (Supplementary Table 2). A search for ESPs in

91 both bins revealed that they contained a similar suite compared to those previously identified in  
92 Lokiarchaeota, which is consistent with their distant phylogenomic relationship (Figure 2). These  
93 lineages are relatively distantly related as evidenced by their difference in GC content and  
94 relatively low pairwise sequence identity of proteins. An analysis of the average amino acid  
95 identity (AAI) showed that Hel\_GB\_A and Hel\_GB\_B shared 1477 genes with an AAI of 51.96%.  
96 When compared to Lokiarchaeota\_CR4, Hel\_GB\_A share 634 out of orthologous genes 3595 and  
97 Hel\_GB\_B had 624 orthologous genes out of 3157. Helarchaeota bins showed the highest AAI  
98 similarity to Odinarchaeota LCB\_4 (45.9%); however, it contained fewer orthologous genes (574  
99 out of 3595 and 555 out of 3157 for Hel\_GB\_A and Hel\_GB\_B, respectively). Additionally, the  
100 Hel\_GB bins differed from Lokiarchaeota in their total gene number, for example Hel\_GB\_A  
101 possessed 3595 genes and CR\_4 possessed 4218; this difference is consistent with the larger  
102 estimated genome size for Lokiarchaeum CR\_4 compared to Hel\_GB\_A (~5.2 Mbp to ~4.6 Mbp)  
103 (Supplementary Table 3, Supplementary Methods). These results add support to the phylum level  
104 distinction observed for Hel\_GB\_A and Hel\_GB\_B in both the ribosomal protein and 16s rRNA  
105 phylogenetic trees. We propose the name Helarchaeota after Hel, the Norse goddess of the  
106 underworld and Loki's daughter for this lineage.

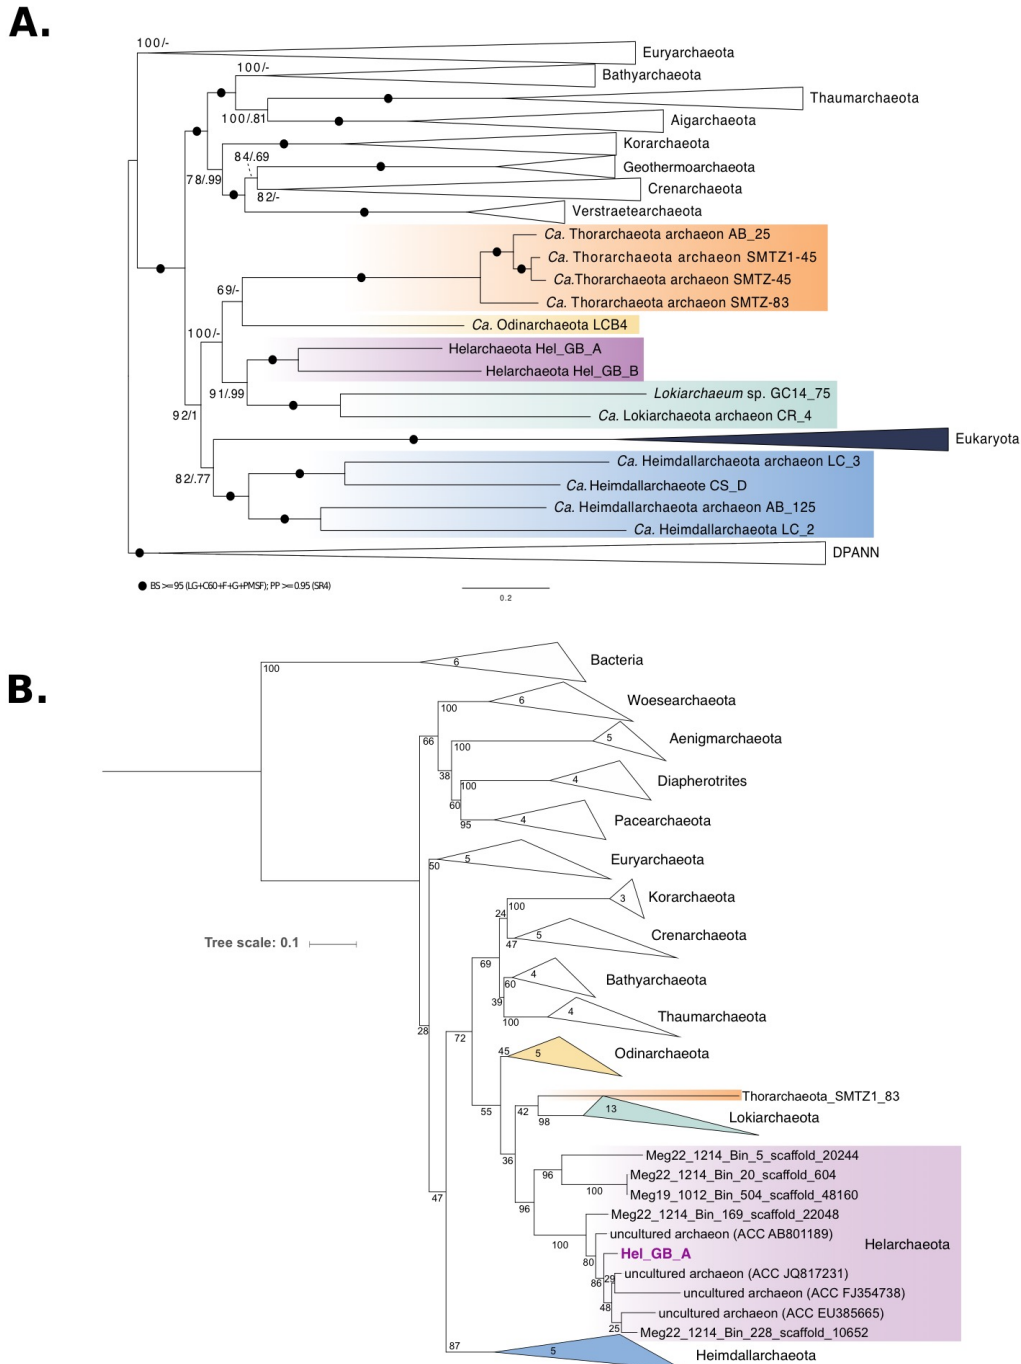

107

108 **Figure 1. Phylogenomic position of Helarchaeota within the Asgard archaea superphylum (A)**

109 Phylogenomic analysis of 56 concatenated ribosomal proteins identified in Helarchaeota bins. Black circles

110 indicate Bootstrap values greater than 95 (LG+C60+F+G+PMSF); Posterior Probability  $\geq 0.95$  (SR4). (B)

111 Maximum-likelihood phylogenetic tree of 16S rRNA gene sequences thought to belong to Helarchaeota.

112 The phylogeny was generated using RAxML (GTRGAMMA model and number of bootstraps determined  
113 using the extended majority-rule consensus tree criterion). The purple box shows possible Helarchaeota  
114 sequences from GB data, as well as closely related published sequences and sequences from newly  
115 identified Helarchaeota bins (identified as Megxx\_xxxx\_Bin\_xxx\_scaffold\_xxxxx). Number of sequences is  
116 depicted in the closed branches.

117

118 **Metabolic analysis of Helarchaeota.** To reconstruct the metabolic potential of these archaea,  
119 the Helarchaeota proteomes were compared to several functional protein databases<sup>20</sup> (Figure  
120 3a). Like many archaea in marine sediments<sup>23</sup>, Helarchaeota may be able to utilize organic carbon  
121 as they possess a variety of extracellular peptidases and carbohydrate degradation enzymes that  
122 include the  $\beta$ -glucosidase,  $\alpha$ -L-arabinofuranosidase and putative rhamnosidase, among others  
123 (Supplementary Table 4 and 5). Degraded organic substrates can then be metabolized via  
124 glycolysis and an incomplete TCA cycle from citrate to malate and a partial gamma-aminobutyric  
125 acid shunt (Figure 3a, Supplementary Table 4). Both Helarchaeota bins are missing fructose-1,6-  
126 biphosphatase and have few genes coding for the pentose phosphate pathway. Genes encoding  
127 for the bifunctional enzyme 3-hexulose-6-phosphate synthase/6-phospho-3-hexuloisomerase  
128 (hps-phi) were identified in Hel\_GB\_B suggesting they may be using the ribulose monophosphate  
129 (RuMP) pathway for formaldehyde anabolism. Genes coding for acetate-CoA ligase (both APM  
130 and ADP-forming) and an alcohol dehydrogenase (*adhE*) were identified in both genomes  
131 suggesting that the organisms may be capable of both fermentation and production of acetyl-  
132 CoA using acetate and alcohols (Supplementary Table 4). Like in Thorarchaeota and  
133 Lokiarchaeota, these genomes possess the large subunit of type IV Ribulose biphosphate  
134 carboxylase<sup>19,24</sup>. Additionally, the Helarchaeota genomes encode for the catalytic subunit of the

135 methanogenic type III ribulose biphosphate carboxylase used for C-fixation<sup>24</sup>. Helarchaeota are  
 136 metabolically distinct from Lokiarchaeota as both Hel\_GB draft genomes appear to lack a  
 137 complete TCA cycle as genes coding for citrate synthase and malate/lactate dehydrogenase are  
 138 absent. Both genomes also likely produce acetyl-CoA using glyceraldehyde 3-phosphate  
 139 dehydrogenase which is absent in Lokiarchaeota<sup>19</sup> (Supplementary Table 4). Helarchaeota  
 140 genomes lack genes that code for enzymes involved in dissimilatory nitrogen and sulfur  
 141 metabolism. Assimilatory genes including *sat*, *cysN* and *cysC* were found in Hel\_GB\_B however  
 142 these genes were not identified in Hel\_GB\_A. This absence may be indicative of species-specific  
 143 characteristics of their genomes or could be a results of genome incompleteness. Additional  
 144 genomes of members of the Helarchaeota will help to fully understand the diversity of these  
 145 pathways across the whole phylum.

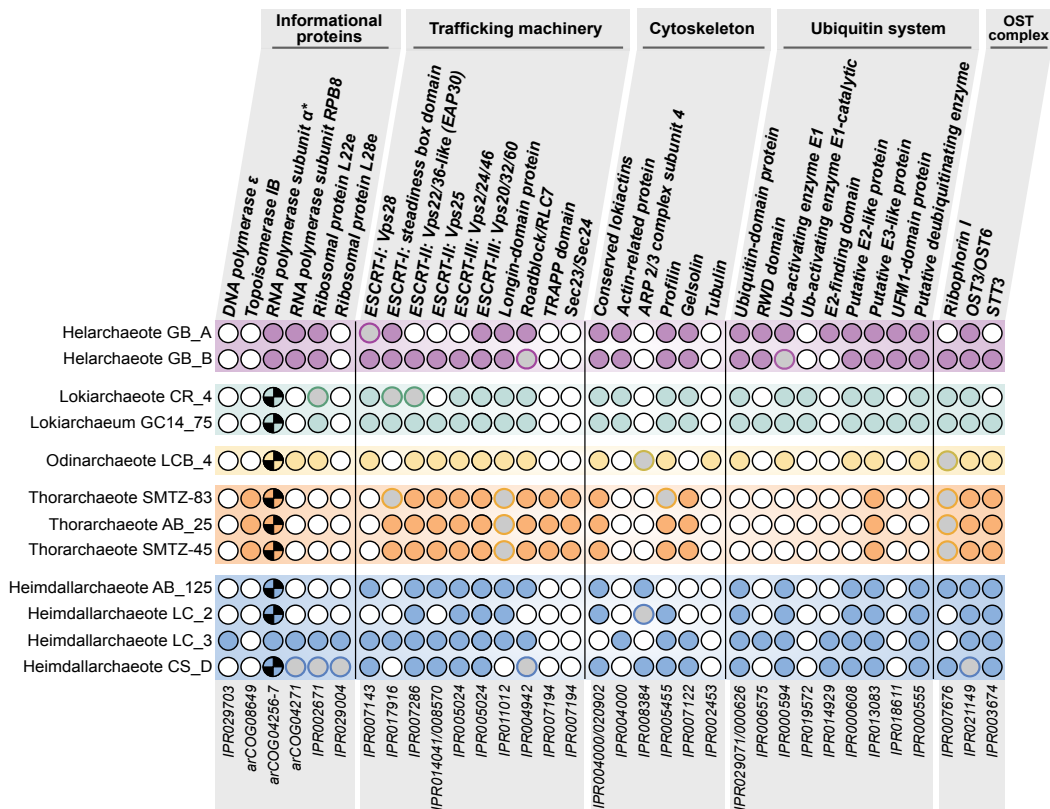

146



147 **Figure 2. Distribution of eukaryotic signature proteins (ESPs) in Helarchaeota and other Asgard archaea.**

148 Numbers under each column correspond to the InterPro accession number (IPR) and Archaeal Clusters of  
149 Orthologous Genes (arcCOG) IDs that were searched for. Full circles refer to cases in which a homologue  
150 was found in the respective genomes. Empty circles with black outlines represent the absence of the ESP.  
151 The checkered pattern in the RNA polymerase subunit alpha represents the fact that the proteins were  
152 split, while the fused proteins are represented by the full circles. Grey circles with borders in any other  
153 color represent cases where the standard profiles were not found but potential homologs were detected.  
154 In the Roadblock proteins, potential homologs were detected but the phylogeny could not support the  
155 close relationship of any of these copies to the Asgard archaea group closest to eukaryotes. In the Ub-  
156 activating enzyme E1 represents homologs found clustered appropriately with its potential orthologs in  
157 the phylogeny but the synteny of this gene with other ubiquitin-related proteins in the genome is  
158 uncertain.

159  
160 Interestingly, both Helarchaeota genomes have *mcrABG*-containing gene clusters  
161 encoding putative methyl-CoM reductase-like enzymes (Figure 3b, Supplementary Figure 2)<sup>4,5,7</sup>.  
162 Phylogenetic analyses of both the A subunit of methyl-CoM reductase-like enzymes  
163 (Supplementary Figure 2) as well as the concatenated A and B subunits (Figure 3b) revealed that  
164 the Helarchaeota sequences are distinct from those involved in methanogenesis and methane  
165 oxidation but cluster with homologs from butane oxidizing Syntrophoarchaea<sup>7</sup> and  
166 Bathyarchaeota with high statistical support (rapid bootstrap support/single branch test  
167 bootstrap support/posterior probability of 99.8/100/1; Figure 3b) excluding the distant homolog  
168 of *Ca. Syntrophoarchaeum caldarius* (OFV68676). Analysis of the Helarchaeota *mcrA* alignment  
169 confirmed that amino acids present at their active sites are similar to those identified on

170 Bathyarchaeota and Syntrophoarchaeum methyl-CoM reductase-like enzymes (Supplementary  
 171 Figure 3). In Syntrophoarchaeum, the methyl-CoM reductase-like enzymes have been suggested  
 172 to activate butane to butyl-CoM<sup>7</sup>. It is proposed that this process is then followed by the  
 173 conversion of butyl-CoM to butyryl-CoA; however, the mechanism of this reaction is still  
 174 unknown. Butyryl-CoA can then be oxidized to acetyl-CoA that can be further feed into the Wood-  
 175 Ljungdahl pathway to produce CO<sub>2</sub><sup>7</sup>. While some n-butane is detected in Guaymas Basin  
 176 sediments (usually below 10 micromolar), methane is the most abundant hydrocarbon  
 177 (Supplementary Table 1) followed by ethane and propane (often reaching the 100 micromolar  
 178 range); thus, a spectrum of short-chain alkanes could potentially be metabolized by  
 179 Helarchaeota<sup>26</sup>.

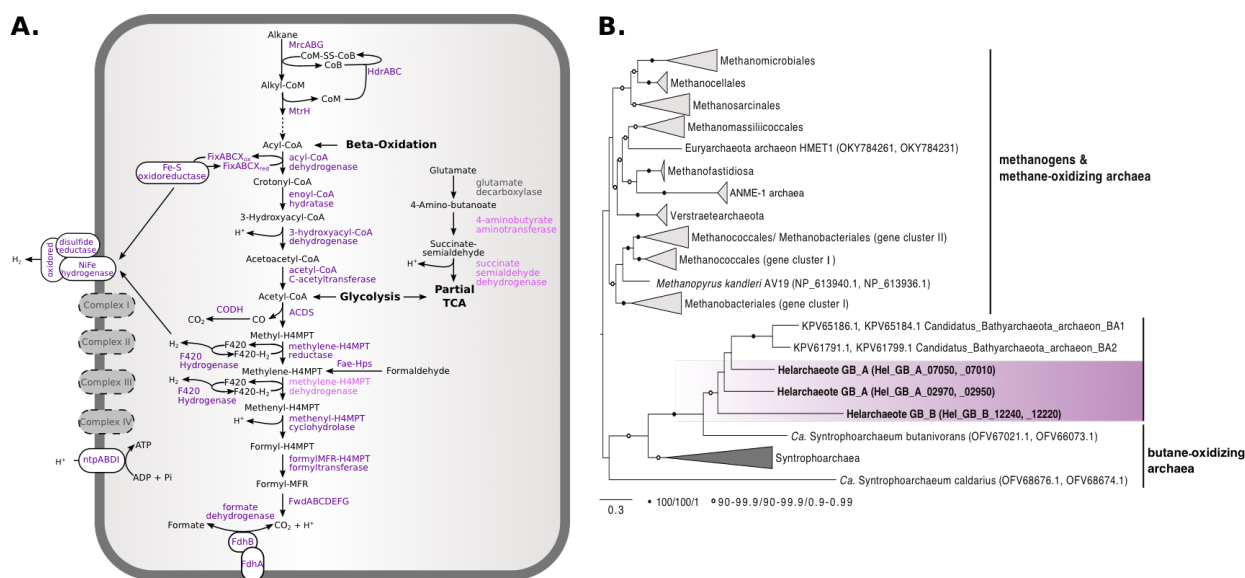

180  
 181 **Figure 3. Metabolic inference of Helarchaeota and phylogenetic analyses of concatenated McrAB**  
 182 **proteins.** (A) Enzymes shown in dark purple are present in both genomes, those shown in light purple are  
 183 present in a single genome and ones in grey are absent. (B) The tree was generated using IQ-tree with  
 184 1000 ultrafast bootstraps, single branch test bootstraps and posterior predictive values from the Bayesian  
 185 phylogeny. White circles indicate bootstrap values of 90-99.9/90-99.9/0.9-0.99 and black filled circles

186 indicate values of 100/100/1. The tree was rooted arbitrarily between the cluster comprising canonical  
187 McrAB homologs and divergent McrAB homologs, respectively. Scale bars indicate the average number  
188 of substitutions per site.

189

190 **Proposed hydrocarbon degradation pathway for Helarchaeota.** Next, we searched for genes  
191 encoding enzymes potentially involved in hydrocarbon utilization pathways including propane  
192 and butane oxidation. Along with the methyl-CoM reductase-like enzyme that could convert  
193 alkane to alkyl-CoM, Helarchaeota possess heterodisulfide reductase subunits ABC (*hdrABC*)  
194 which is needed to recycle the CoM and CoB heterodisulfides after this reaction occurs (Figure 3  
195 and 4)<sup>7,8</sup>. The conversion of alkyl-CoM to acyl-CoA is currently not understood in archaea capable  
196 of butane oxidation. Novel alkyl-binding versions of methyltransferases would be required to  
197 convert alkyl-CoM to butyl-CoA or other acyl-CoAs, as discussed for *Ca. S. butanivorans*<sup>7</sup>. Genes  
198 coding for methyltransferases were identified in both Helarchaeota genomes, including a likely  
199 tetrahydromethanopterin S-methyltransferase subunit H (MtrH) homolog (Figure 4;  
200 Supplementary Table 4). Short-chain acyl-CoA could be oxidized to acetyl-CoA using the beta-  
201 oxidation pathway via a short-chain acyl-CoA dehydrogenase, enoyl-CoA hydratase, 3-  
202 hydroxyacyl-CoA dehydrogenase and acetyl-CoA acetyltransferase, candidate enzymes for all of  
203 which are present in the Helarchaeota genomes and are also found in genomes of other Asgard  
204 archaea (Figure 4)<sup>19</sup>. Along with these enzymes, genes coding for the associated electron transfer  
205 systems, including an Fe-S oxidoreductase and all subunits of the electron transfer flavoprotein  
206 (ETF) complex were identified in Helarchaeota (Figure 4). Acetyl-CoA produced by beta-oxidation  
207 might be further oxidized to CO<sub>2</sub> via the Wood-Ljungdahl pathway, using among others the

208 classical 5,10-methylene-tetrahydromethanopterin reductase (Figure 3a and 4).

209

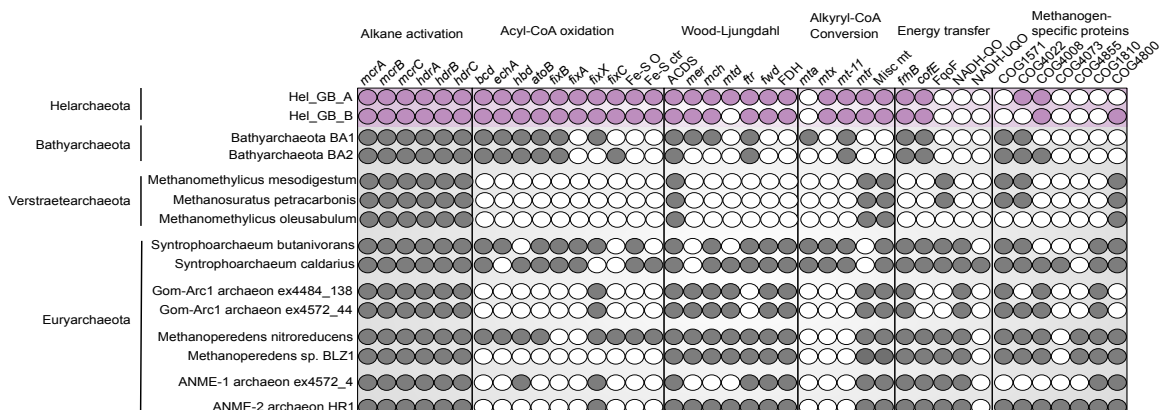

210

211 **Figure 4. Comparison of Helarchaeota alkane metabolism to other alkane oxidizing and methanogenic**

212 **archaea.** Alkane metabolism of Helarchaeota compared to Bathyarchaeota and *Ca.* Syntrophoarchaeum

213 sp., Verstraetearchaeota, GoM-Arc1 sp., ANME-1 sp. and ANME-2 sp. A list of genes and corresponding

214 contig identifiers can be found in Supplementary Table 4.

215

216 **Three possible energy-transferring mechanisms for Helarchaeota.** To make anaerobic alkane

217 oxidation energetically favorable, it must be coupled to the reduction of an internal electron

218 acceptor or transferred to a syntrophic partner that can perform this reaction<sup>7,26,27</sup>. We could not

219 identify an internal electron sink or any canonical terminal reductases used by ANME archaea

220 (such as iron, sulfur or nitrogen), leading to the conclusion that a syntrophic partner organism

221 would be necessary to enable growth on short-chain hydrocarbons. However, we could not

222 identify any obvious syntrophic partner organisms based on co-occurrence analyses of

223 abundance profiles of metagenomic datasets generated in this study<sup>20</sup>.

224 An evaluation of traditional energy transferring mechanisms showed that our  
225 Helarchaeota bins lack genes coding for NADH:ubiquinone oxidoreductase,  $F_{420}$ -dependent  
226 oxidoreductase,  $F_{420}H_2$ :quinone oxidoreductase and NADH:quinone oxidoreductase that were  
227 identified in *Ca. S. butanivorans* (Figure 4)<sup>7</sup>. These electron-carrying proteins are important for  
228 energy transfer across the cell membrane and are common among syntrophic organisms<sup>2,28,29</sup>.  
229 Helarchaeota also lack genes coding for pili or cytochromes that are generally associated with  
230 electron transfer to a bacterial partner, as demonstrated for different ANME archaea<sup>26,30</sup>.  
231 Therefore, Helarchaeota may use a thus far unknown approach for energy conservation. Below  
232 we analyzed potential energy-transferring mechanisms that might be involved in syntrophic  
233 interactions between Helarchaeota and potential partner organisms.

234 A possible candidate for energy transfer to a partner may be formate dehydrogenase  
235 because substrate exchange in form of formate has previously been described to occur between  
236 methanogens and sulfur-reducing bacteria<sup>27</sup>. Helarchaeota genomes code for the alpha and beta  
237 subunits of a membrane-bound formate dehydrogenase (EC. 1.2.1.2) that could facilitate this  
238 transfer (Figure 2, Supplementary Table 4). However, to our knowledge formate transfer has not  
239 been shown to mediate methane oxidation. Alternatively, Helarchaeota may possess a novel  
240 redox-active complex. In both Helarchaeota bins, a gene cluster was found encoding three  
241 proteins that were identified as members of the HydB/Nqo4-like superfamily, Oxidored\_q6  
242 superfamily and a Fe-S disulfide reductase with a FlpD domain (mvhD) (Figure 5a). An analysis of  
243 these three proteins showed that each possessed transmembrane motifs (Figure 5b, and  
244 Supplementary Methods). While the membrane association of the disulfide reductase/FlpD

245 needs to be confirmed, interactions with the other two membrane-associated subunits may  
246 allow for the bifurcated electrons to be transferred across the membrane.

247 Finally, hydrogen production and release was also considered as possible electron sink for  
248 Helarchaeota. We identified several hydrogenases and putative Fe-S disulfide reductase-  
249 encoding genes in the Helarchaeota genomes. Subsequent phylogenetic analyses revealed that  
250 the majority of these hydrogenases represent small and large subunits of group IIIC hydrogenases  
251 (methanogenic  $F_{420}$ -non-reducing hydrogenase (*mvh*)) that are usually involved in bifurcating  
252 electrons from hydrogen (Supplementary Figure 4, Supplementary Table 4). In contrast, while  
253 homologs belonging to the above mentioned Oxidored\_q6 superfamily protein family are often  
254 found to be associated with group IV hydrogenases, canonical membrane-bound group IV-  
255 hydrogenases could not be identified in the genomes of the Helarchaeota. Altogether, this  
256 indicates that hydrogen could play a central role in energy metabolism of Helarchaeota, but the  
257 absence of a classical membrane-bound hydrogenase makes it unlikely that hydrogen is the  
258 major syntrophic electron carrier.

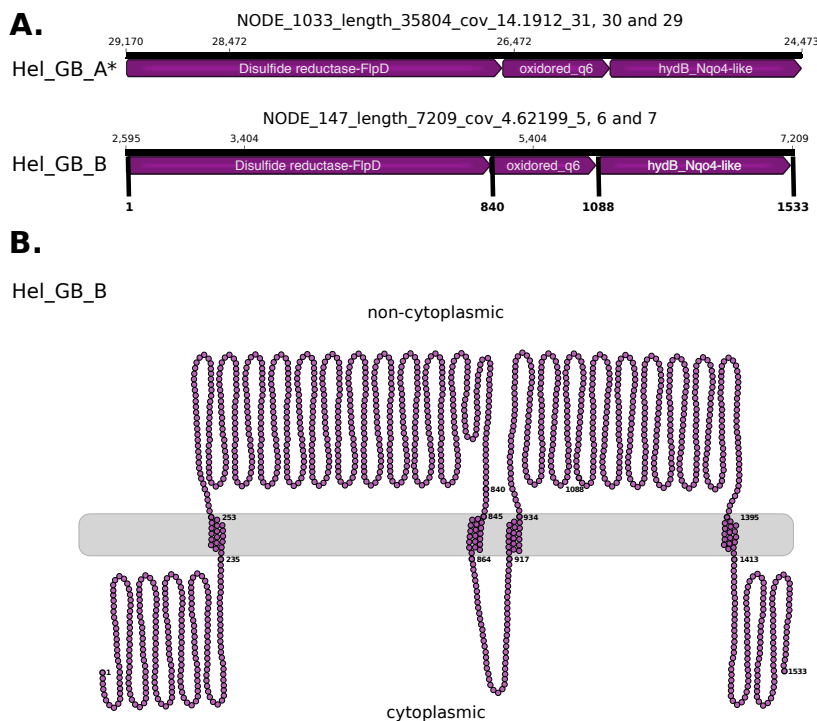

259

260 **Figure 5. Depiction of a gene cluster found in both Helarchaeota genomes that consists of genes that**

261 **encode for a possible energy-transferring complex.** (A) In Hel\_GB\_A the complex was found on the

262 reverse strand but has been oriented in the forward direction for clarity (asterisk). Arrows indicate the

263 length of the reading frame. Gene names were predicted by various databases (Supplementary Methods).

264 Small numbers located above the arrows refer to the nucleotide position for the full contig. Bold numbers

265 on Hel\_GB\_B refer to the amino acid number of the whole complex. (B) Figure depicts the membrane

266 motifs identified on NODE\_147\_length\_7209\_cov\_4.62199\_5, 6 and 7 using various programs

267 (Supplementary methods). Each circle represents a single amino acid. Bold circles represent amino acids

268 at the start of the protein, the start and end of the transmembrane sites, and the end of the complex.

269 Numbering corresponds to the amino acid numbers of Hel\_GB\_B in panel (A). A full loop represents 50

270 amino acids and does not reflect the secondary structure of the complex.

271

## 272 Discussion

273 Historically methanogenesis and anaerobic methane oxidation were regarded as the only  
274 examples of anaerobic archaeal short-chain alkane metabolism. The enzymes acting in these  
275 pathways were considered to be biochemically and phylogenetically unique and limited to  
276 lineages within the Euryarchaeota<sup>4</sup>. This study represents the discovery of a novel phylum and  
277 the first indications for anaerobic short-chain alkane oxidation using a MCR-like homolog in the  
278 Asgard archaea. Since the presence of these *mcr* genes is restricted to Helarchaeota among the  
279 known Asgard archaea<sup>19</sup>, these genes were likely transferred to Helarchaeota and do not  
280 constitute an ancestral trait within the Asgard superphylum. Based on current phylogenetic  
281 analysis, the Helarchaeota *mcr* gene cluster may have been horizontally acquired from either  
282 Bathyarchaeota or *Ca. Syntrophoarchaeum* (Fig. 1b, Supplementary Figure 3). Due to this close  
283 relationship, we based our analysis of Helarchaeota's ability to perform anaerobic short-chain  
284 hydrocarbon oxidation on the pathway proposed for *Ca. Syntrophoarchaeum*. Helarchaeota  
285 probably utilize a similar short-chain alkane as a substrate in lieu of methane, but given the low  
286 butane concentrations at our site it may not be an exclusive substrate.

287 Our comparison to *Ca. S. butanivorans* shows a consistent presence in genes necessary  
288 for this metabolism including a complete Wood-Ljungdahl pathway, acyl oxidation pathway and  
289 internal electron transferring systems. These electron-transferring systems are essential  
290 housekeeping components that act as electron carriers for oxidation reactions. Interestingly, in  
291 the Wood-Ljungdahl pathway identified in *Ca. S. butanivorans*, the bacterial enzyme is 5,10-  
292 methylene-tetrahydrofolate reductase (*met*) is thought to be substituting for the missing 5,10-  
293 methylene-tetrahydromethanopterin reductase (*mer*)<sup>7</sup>. In contrast, Helarchaeota encode the



294 canonical archaeal-type mer. To render anaerobic butane oxidation energetically favorable, it  
295 must be coupled to the reduction of an electron acceptor such as nitrate, sulfate or iron<sup>7,26,27</sup>. In  
296 ANME archaea that lack genes for internal electron acceptors, methane oxidation is enabled  
297 through the transfer of electrons to a syntrophic partner organism. In Syntrophoarchaeum,  
298 syntrophic butane oxidation is thought to occur through the exchange of electrons via pili and/or  
299 cytochromes with sulfate-reducing bacteria<sup>7</sup>. Helarchaeota do not appear to encode any of the  
300 systems traditionally associated with syntrophy and no partner was identified in this study. Thus,  
301 further research is needed to identify possible bacterial partners.

302         Furthermore, the hypothesis for Helarchaeota growth through the anaerobic oxidation of  
303 short-chain alkanes remains to be confirmed as the genomes of members of this group do not  
304 encode canonical routes for electron transfer to a partner bacterium. However, we identified the  
305 genetic potential for potential enzymes that may be involved in transfer of electrons. Some  
306 methanogenic archaea use formate for syntrophic energy transfer to a syntrophic partner;  
307 therefore, the reverse reaction has been speculated to be energetically feasible for methane  
308 oxidation<sup>27</sup>. If this is true, the presence of a membrane-bound formate dehydrogenase in the  
309 Helarchaeota genomes may support this electron-transferring mechanism, however to our  
310 knowledge this has never been shown for an ANME archaea so far. Alternatively, the type 3 NiFe-  
311 hydrogenases encoded by Helarchaeota may be involved in transfer of hydrogen to a partner  
312 organism. For example, we identified a protein complex distantly related to the *mvh-hdr* of  
313 methanogens for electron transfer (Supplementary material). *Mvh-hdr* structures have been  
314 proposed to be potentially used by non-obligate hydrogenotrophic methanogens for energy  
315 transfer, but the directionality of hydrogen exchange could easily be reversed<sup>2</sup>. These

316 methanogens form syntrophic associations with fermenting, H<sub>2</sub>-producing bacteria, lack  
317 dedicated cytochromes or pili and use the *mvh-hdr* for electron bifurcation<sup>2</sup>. The detection of a  
318 hydrophobic region in the *mvh-hdr* complex led to the suggestion that this complex could be  
319 membrane bound and act as mechanism for electron transfer across the membrane; however, a  
320 transmembrane association has never been successfully shown<sup>2</sup>. While the membrane  
321 association of the disulfide reductase/FlpD needs to be confirmed, we were able to detect several  
322 other transmembrane motifs in the associated proteins that could potentially allow electron  
323 transfer in form of hydrogen to an external partner. Thus, while we propose that the most likely  
324 explanation for anaerobic short-chain alkane oxidation in Helarchaeota is via a syntrophic  
325 interaction with a partner, additional experiments are needed to confirm this working hypothesis.

326         The discovery of alkane-oxidizing pathways and possible syntrophic interactions in a new  
327 phylum of Asgard archaea indicates a much wider phylogenetic range for hydrocarbon utilization.  
328 Based on their phylogenetic distribution, the Helarchaeota *mcr* operon may have been  
329 horizontally transferred from either Bathyarchaeota or Syntrophoarchaeum. However, the  
330 preservation of a horizontally transferred pathway indicative of a competitive advantage; it  
331 follows that gene transfers among different archaeal phyla reflect alkane oxidation as a desirable  
332 metabolic trait. The discovery of the alkyl-CoM reductases and alkane-oxidizing pathways among  
333 the Asgard archaea indicates ecological roles for these still cryptic organisms, and opens up a  
334 wider perspective on the evolution and expansion of hydrocarbon-oxidizing pathways  
335 throughout the archaeal domain.

336

337

## 338 **Methods**

339 **Sample collection and processing.** Samples analyzed here are part of a study that aims to characterize  
340 the geochemical conditions and microbial community of Guaymas Basin (GB) hydrothermal vent  
341 sediments (Gulf of California, Mexico)<sup>31,32</sup>. The two genomic bins discussed in this paper, Hel\_GB\_A and  
342 Hel\_GB\_B, were obtained from sediment core samples collected in December 2009 on *Alvin* dives 4569\_2  
343 and 4571\_4 respectively<sup>21</sup>. Immediately after the dive, freshly recovered sediment cores were separated  
344 into shallow (0-3 cm), intermediate (12-15 cm) and deep (21-24 cm) sections for further molecular and  
345 geochemical analysis, and frozen at -80°C on the ship until shore-based DNA extraction. Hel\_GB\_A was  
346 recovered from the intermediate sediment (~28°C) and Hel\_GB\_B was recovered from shallow sediment  
347 (~10°C) from a nearby core (Supplementary Table 1); the sampling context and geochemical gradients of  
348 these hydrothermally influenced sediments are published and described in detail<sup>21,31</sup>.

349 DNA was extracted from sediment samples using the MO BIO – PowerMax Soil DNA Isolation kit  
350 and sent to the Joint Genome Institute (JGI) for sequencing. A lane of Illumina reads (HiSeq–2500 1TB,  
351 read length of 2x151 bp) was generated for both samples. A total of 226,647,966 and 241,605,888 reads  
352 were generated for samples from dives for 4569-2 and 4571-4, respectively. Trimmed, screened, paired-  
353 end Illumina reads were assembled using the megahit assembler using a range of Kmers (See  
354 Supplementary Methods).

355  
356 **Genome reconstruction.** The contigs from the JGI assembled data were binned using ESOM<sup>33</sup>, MetaBAT<sup>34</sup>  
357 and CONCOCT<sup>35</sup> and resulting bins were combined using DAS Tool (version 1.0)<sup>36</sup> (See Supplementary  
358 Methods). CheckM lineage\_wf (v1.0.5) was run on bins generated from DAS\_Tool and 577 bins showed  
359 an completeness > 50% and were characterized further<sup>37</sup>. 37 Phylosift<sup>38</sup> identified marker genes were used  
360 for preliminary phylogenetic identification of individual bins (Supplementary Table 6). Thereby, we  
361 identified two genomes, belonging to a previously uncharacterized phylum within the Asgard archaea,

362 which we named Helarchaeota. To improve the quality of these two Helarchaeota bins (increase the  
363 length of the DNA fragments and lower total number), we used Metaspades to reassemble the contigs in  
364 each individual bin producing scaffolds. Additionally, we tried to improve the overall assemblies by  
365 reassembling the trimmed, screened, paired-end Illumina reads provided by JGI using both IDBA-UD and  
366 Metaspades (Supplementary Methods). Binning procedures (using scaffolds longer than 2000 bp) as  
367 previously described in Supplementary Methods for the original bins were repeated with these new  
368 assemblies. All bins were compared to the original Helarchaeota bins using blastn<sup>39</sup> for identification.  
369 Mmgenome<sup>40</sup> and CheckM<sup>37</sup> were used to calculate genome statistics (i.e. contig length, genome size,  
370 contamination and completeness). The highest quality Helarchaeota bin from each sample was chosen  
371 for further analyses. For the 4572-4 dataset, the best bin was generated using the Metaspades reassembly  
372 on the trimmed data and for the 4569-2 dataset the best bin was recovered using the Metaspades  
373 reassembly on the original Hel bin contigs. The final genomes were further cleaned by GC content, paired-  
374 end connections, sequence depth and coverage using Mmgenome<sup>40</sup>. CheckM was rerun on cleaned bins  
375 to estimate the Hel\_GB\_A to be 82% and Hel\_GB\_B to be 87% complete and both bins were characterized  
376 by a low degree of contamination (between 1.4-2.8% with no redundancy) (Table 1)<sup>37</sup>. Genome size was  
377 estimated to be 4.6 Mbp for Hel\_GB\_A and 4.1 for Hel\_GB\_B and was calculated using percent  
378 completeness and bin size to extrapolate the likely size of the complete genome. CompareM<sup>41</sup> was used  
379 to analysis differences between Helarchaeota bins and published Asgard bins using the command python  
380 comparem aai\_wf --tmp\_dir tmp/ --file\_ext fa -c 8 aai\_compair\_loki aai\_compair\_loki\_output.

381

382 **16S rRNA gene analysis.** Neither bin possessed a 16S rRNA gene sequence<sup>38</sup>, and to uncover potentially  
383 unbinned 16S rRNA gene sequences from Helarchaeota, all 16S rRNA gene sequences obtained from  
384 samples 4569\_2 and 4571\_4 were identified using JGI-IMG annotations, regardless of whether or not the  
385 contig was successfully binned. These 16S rRNA gene sequences were compared using blastn<sup>39</sup> (blastn -

386 outfmt 6 -query Hel\_possible\_16s.fasta -db New\_Hel\_16s -out Hel\_possible\_16s\_blast.txt -evaluate 1E-20)  
387 to newly acquired 16S rRNA gene sequences from MAGs recovered from preliminary data from new GB  
388 sites. A 37 Phylosift<sup>38</sup> marker genes tree was used to assign taxonomy to these MAGs. We were able to  
389 identify five MAGs that possessed 16s and that formed a monophyletic group with our Hel\_GB bins  
390 (Supplementary Table 2; Megxx in Figure 2). Of the unbinned 16S rRNA gene sequences one was identified  
391 as likely Helarchaeota sequence. The contig was retrieved from the 4572\_4 assembly (designated  
392 Ga0180301\_10078946) and was 2090 bp long and encoded for an 16S rRNA gene sequence that was 1058  
393 bp long. Given the small size of this contig relative to the length of the 16S rRNA gene none of the other  
394 genes on the contig could be annotated. Blastn<sup>39</sup> comparison to published Asgard 16S rRNA gene  
395 sequences was performed using the following command: blastn -outfmt 6 -query Hel\_possible\_16s.fasta  
396 -db Asgrad\_16s -out Hel\_possible\_16s\_blast.txt -evaluate 1E-20 (Supplementary Table 2). The GC content  
397 of each 16S rRNA gene sequence was calculated using the Geo-omics script length+GC.pl  
398 (<https://github.com/Geo-omics/scripts/blob/master/AssemblyTools/length%2BGC.pl>). For a further  
399 phylogenetic placement, the 16S rRNA gene sequences were aligned to the SILVA database (SINA v1.2.11)  
400 using the SILVA online server<sup>42</sup> and Geneious (v10.1.3)<sup>43</sup> was used to manually trim sequences. The  
401 alignment also contained 16S rRNA gene sequences from the new, preliminary Helarchaeota bins. The  
402 cleaned alignment was used to generated a maximum-likelihood tree with RAxML as follows: “/raxmlHPC-  
403 PTHREADS-AVX -T 20 -f a -m GTRGAMMA -N autoMRE -p 12345 -x 12345 -s Nucleotide\_alignment.phy -n  
404 output” (Figure 1b).

405

406 **Phylogenetic analysis of ribosomal proteins.** For a more detailed phylogenetic placement, we used  
407 BLASTp<sup>44</sup> to identify orthologs of 56 ribosomal proteins in the two Helarchaeota bins, as well as from a  
408 selection of 130 representative taxa of archaeal diversity and 14 eukaryotes. The full list of marker genes  
409 selected for phylogenomic analyses is shown in Supplementary Table 7. Individual protein datasets were

410 aligned using mafft-linsi<sup>45</sup> and ambiguously aligned positions were trimmed using BMGE (-m BLOSUM30)<sup>46</sup>.  
411 Maximum likelihood (ML) individual phylogenies were reconstructed using IQtree v. 1.5.5<sup>47</sup> under the  
412 LG+C20+G substitution model with 1000 ultrafast bootstraps that were manually inspected. Trimmed  
413 alignments were concatenated into a supermatrix, and two additional datasets were generated by  
414 removing eukaryotic and/or DPANN homologues to test the impact of taxon sampling on phylogenetic  
415 reconstruction. For each of these concatenated datasets, phylogenies were inferred using ML and  
416 Bayesian approaches. ML phylogenies were reconstructed using IQtree under the LG+C60+F+G+PMSF  
417 model<sup>48</sup>. Statistical support for branches was calculated using 100 bootstraps replicated under the same  
418 model. To test robustness of the phylogenies, the dataset was subjected to several treatments. For the  
419 ‘full dataset’ (i.e., with all 146 taxa), we tested the impact of removing the 25% fastest-evolving sites, as  
420 within a deep phylogenetic analysis, these sites are often saturated with multiple substitutions and, as a  
421 result of model-misspecification can manifest in an artifactual signal<sup>50-52</sup>. The corresponding ML tree was  
422 inferred as described above. Bayesian phylogenies were reconstructed with Phylobayes for the dataset  
423 “without DPANN” under the LG+GTR model. Four independent Markov chain Monte Carlo chains were  
424 run for ~38,000 generations. After a burn-in of 20%, convergence was achieved for three of the chains  
425 (maxdiff < 0.29). The initial supermatrix was also recoded into 4 categories, in order to ameliorate effects  
426 of model misspecification and saturation<sup>52</sup> and the corresponding phylogeny was reconstructed with  
427 Phylobayes, under the CAT+GTR model. Four independent Markov chain Monte Carlo chains were run  
428 for ~49,000 generations. After a burn-in of 20 convergence was achieved for all four the chains (maxdiff  
429 < 0.19). All phylogenetic analyses performed are summarized in Supplementary Table 8, including maxdiff  
430 values and statistical support for the placement of Helarchaeota, and of eukaryotes.

431

432 **Phylogenetic analysis of McrA and concatenated McrA and McrB proteins.** McrA homologs were aligned  
433 using mafft-linsi<sup>45</sup>, trimmed with trimAL<sup>53</sup> and the final alignment consisting of 528 sites was subjected to

434 phylogenetic analyses using v. 1.5.5<sup>47</sup> with the LG+C60+R+F model. Support values were estimated using  
435 1000 ultrafast bootstraps<sup>54</sup> and SH-like approximate likelihood ratio test<sup>55</sup>, respectively. Sequences for  
436 McrA and B were aligned separately with mafft-linsi<sup>45</sup> and trimmed using trimAL. Subsequently, McrA and  
437 McrB encoded in the same gene cluster, were concatenated yielding a total alignment of 972 sites.  
438 Bayesian and Maximum likelihood phylogenies were inferred using IQtree v. 1.5.5<sup>47</sup> with the mixture  
439 model LG+C60+R+F and PhyloBayes v. 3.2<sup>56</sup> using the CAT-GTR model. For Maximum likelihood inference,  
440 support values were estimated using 1000 ultrafast bootstraps<sup>54</sup> and SH-like approximate likelihood ratio  
441 test<sup>55</sup>, respectively. For Bayesian analyses, four chains were run in parallel, sampling every 50 points until  
442 convergence was reached (maximum difference < 0.07; mean difference < 0.002). The first 25% or the  
443 respective generations were selected as burn-in. Phylobayes posterior predictive values were mapped  
444 onto the IQtree using sumlabels from the DendroPy package<sup>57</sup>. The final trees were rooted artificially  
445 between the canonical Mcr and divergent Mcr-like proteins, respectively.

446  
447 **Metabolic Analyses.** Gene prediction for the two Helarchaeota bins was performed using prodigal<sup>58</sup>  
448 (V2.6.2) with default settings and Prokka<sup>59</sup> (v1.12) with the extension '-kingdom archaea'. Results for both  
449 methods were comparable and yielded a total of 3,574-3,769 and 3,164-3,287 genes for Hel\_GB\_A and  
450 Hel\_GB\_B, respectively, with Prokka consistently identifying fewer genes. Genes were annotated by  
451 uploading the protein fasta files from both methods to KAAS (KEGG Automatic Annotation Server) for  
452 complete or draft genomes to assign orthologs<sup>60</sup>. Files were run using the following settings: prokaryotic  
453 option, GhostX and bi-directional best hit (BBH)<sup>60</sup>. Additionally, genes were annotated by JGI-IMG<sup>61</sup> to  
454 confirm hits using two independent databases. Hits of interest were confirmed using blastp on the NCBI  
455 webserver<sup>44</sup>. The dbCAN<sup>62</sup> and MEROPS<sup>63</sup> webserver were run using default conditions for identification  
456 of carbohydrate degrading enzymes and peptidases respectively. Hits with e-values lower than  $e^{-20}$  were

457 discarded. In addition to these methods an extended search was used to categorize genes involved in  
458 butane metabolism, syntrophy and energy transfer.

459 Identified genes predicted to code for putative alkane oxidation proteins were similar to those  
460 described from *Candidatus Syntrophoarchaeum* spp.. Therefore, a blastp<sup>44</sup> database consisting of proteins  
461 predicted to be involved in the alkane oxidation pathway of *Ca. Syntrophoarchaeum* was created in order  
462 to identify additional proteins in Helarchaeota, which may function in alkane oxidation. Positive hits were  
463 confirmed with blastp<sup>44</sup> on the NCBI webserver and compared to the annotations from JGI-IMG<sup>61</sup>,  
464 Interpro<sup>64</sup>, PROKKA<sup>59</sup> and KAAS<sup>60</sup> annotation. Genes for *mcrABG* were further confirmed by a HMMER<sup>65</sup>  
465 search to a published database using the designated threshold values<sup>66</sup> and multiple MCR trees (see  
466 Methods). To confirm that the contigs with the *mcrA* gene cluster were not missbined, all other genes on  
467 these contigs were analyzed for their phylogenetic placement and gene content. The prodigal protein  
468 predictions for genes on the contigs with *mcrA* operons were used to determine directionality and length  
469 of the potential operon.

470 To identify genes that are involved in electron and hydrogen transfer across the membrane, a  
471 database was created of known genes relevant in syntrophy that were download from NCBI. The protein  
472 sequences of the two Helarchaeota genomes were blasted against the database to detect relevant hits  
473 (E-value  $\geq e^{-10}$ ). All hits were confirmed using the NCBI webserver, Interpro, JGI-IMG and KEGG.  
474 Hydrogenases were identified by a HMMER search to published database using the designated threshold  
475 values<sup>67</sup>. Hits were confirmed with comparisons against JGI annotations and NCBI blasts, the HydDB  
476 database<sup>68</sup> and a manual database made from published sequences<sup>69,70</sup>. All detected hydrogenases were  
477 used to generate two phylogenetic trees, one for proteins identified as small subunits and one for large  
478 subunits in order to properly identify the different hydrogenase subgroups. Hydrogenases that are part  
479 of the proposed complex were then further analyzed to evaluate if this was a possible operon by looking  
480 for possible transcription factors and binding motifs (Supplementary Methods).



481

482 **ESP Identification.** Gene prediction for the two Helarchaeota bins was performed using prodigal<sup>58</sup> (V2.6.2)  
483 with default settings. All the hypothetical proteins inferred in both Helarchaeota were used as seeds  
484 against InterPro<sup>64</sup>, arCOG<sup>71</sup> and nr using BLAST<sup>44</sup>. The annotation table from Zaremba-Niedzwiedzka, *et al.*  
485 2017. was used as a basis for the comparison<sup>12</sup>. The IPRs (or in some cases, the arCOGs) listed in the  
486 Zaremba-Niedzwiedzka, et al. 2017 were searched for in the Helarchaeota genomes<sup>12</sup> and the resulting  
487 information was used to complete the presence/absence table. When something that had previously been  
488 detected in an Asgard bin was not found in a Helarchaeota bin using the InterPro/arCOG annotations,  
489 BLASTs were carried out using the closest Asgard seeds to verify the absence. In some cases, specific  
490 analyses were used to verify the homology or relevance of particular sequences. The details for each  
491 individual ESP are depicted in supplementary materials.

492

493 **Data Availability.** The raw reads from the metagenomes described in this study are available at JGI under  
494 the IMG genome ID 3300014911 and 3300013103 for samples 4569-2 and 4571-4, respectively. Genome  
495 sequences are available at NCBI under the accession numbers SAMN09406154 and SAMN09406174 for  
496 Hel\_GB\_A and Hel\_GB\_B respectively. Both are associated with BioProject PRJNA362212.

497

498

499

500

501

502

503

504

## 505 Tables

506 **Table 1.** Bin statistics for Helarchaeota Bins. Degree of completeness, contamination and heterogeneity  
507 was determined using CheckM<sup>37</sup>.

| SeqID                       | Hel_GB_A | Hel_GB_B |
|-----------------------------|----------|----------|
| Completeness (%)            | 82.4     | 86.92    |
| Contamination (%)           | 2.8      | 1.40     |
| Strain heterogeneity (%)    | 0        | 0        |
| Scaffold number             | 333      | 182      |
| GC content (%)              | 35.40    | 28.00    |
| N50 (bp)                    | 15,161   | 28,908   |
| Length total (Mbp)          | 3.84     | 3.54     |
| Estimated Genome size (Mbp) | 4.6      | 4.1      |
| Longest contig (bp)         | 52,512   | 72,379   |
| Mean contig (bp)            | 11,531   | 19,467   |

508

509

510

511 1. G E Claypool & Kvenvolden, and K. A. Methane and other Hydrocarbon Gases in Marine

512 Sediment. *Annu. Rev. Earth Planet. Sci.* **11**, 299–327 (1983).

513 2. Thauer, R. K., Kaster, A.-K., Seedorf, H., Buckel, W. & Hedderich, R. Methanogenic archaea:

514 ecologically relevant differences in energy conservation. *Nat. Rev. Microbiol.* **6**, 579–591

515 (2008).

516 3. Reeburgh, W. S. Oceanic Methane Biogeochemistry. *Chem. Rev.* **107**, 486–513 (2007).

517 4. Spang, A., Caceres, E. F. & Ettema, T. J. G. Genomic exploration of the diversity, ecology, and

518 evolution of the archaeal domain of life. *Science* **357**, eaaf3883 (2017).

519 5. Evans, P. N. *et al.* Methane metabolism in the archaeal phylum Bathyarchaeota revealed by

520 genome-centric metagenomics. *Science* **350**, 434–438 (2015).

- 521 6. Vanwonterghem, I. *et al.* Methylophilic methanogenesis discovered in the archaeal phylum  
522 Verstraetearchaeota. *Nat. Microbiol.* **1**, 16170 (2016).
- 523 7. Laso-Pérez, R. *et al.* Thermophilic archaea activate butane via alkyl-coenzyme M formation.  
524 *Nature* **539**, 396–401 (2016).
- 525 8. Dombrowski, N., Seitz, K. W., Teske, A. P. & Baker, B. J. Genomic insights into potential  
526 interdependencies in microbial hydrocarbon and nutrient cycling in hydrothermal sediments.  
527 *Microbiome* **5**, 106 (2017).
- 528 9. Bazylnski, D. A., Farrington, J. W. & Jannasch, H. W. Hydrocarbons in surface sediments from  
529 a Guaymas Basin hydrothermal vent site. *Org. Geochem.* **12**, 547–558 (1988).
- 530 10. Teske, A., Callaghan, A. V. & LaRowe, D. E. Biosphere frontiers of subsurface life in the  
531 sedimented hydrothermal system of Guaymas Basin. *Front. Microbiol.* **5**, (2014).
- 532 11. Von Damm, K. L., Edmond, J. M., Measures, C. I. & Grant, B. Chemistry of submarine  
533 hydrothermal solutions at Guaymas Basin, Gulf of California. *Geochim. Cosmochim. Acta* **49**,  
534 2221–2237 (1985).
- 535 12. Zaremba-Niedzwiedzka, K. *et al.* Asgard archaea illuminate the origin of eukaryotic  
536 cellular complexity. *Nature* **541**, 353–358 (2017).
- 537 13. Spang, A. *et al.* Complex archaea that bridge the gap between prokaryotes and  
538 eukaryotes. *Nature* **521**, 173–179 (2015).
- 539 14. Seitz, K. W., Lazar, C. S., Hinrichs, K.-U., Teske, A. P. & Baker, B. J. Genomic  
540 reconstruction of a novel, deeply branched sediment archaeal phylum with pathways for  
541 acetogenesis and sulfur reduction. *ISME J* **10**, 1696–1705 (2016).

- 542 15. Jørgensen, S. L., Thorseth, I. H., Pedersen, R. B., Baumberger, T. & Schleper, C.  
543 Quantitative and phylogenetic study of the Deep Sea Archaeal Group in sediments of the  
544 Arctic mid-ocean spreading ridge. *Front. Microbiol.* **4**, (2013).
- 545 16. Jorgensen, S. L. *et al.* Correlating microbial community profiles with geochemical data in  
546 highly stratified sediments from the Arctic Mid-Ocean Ridge. *Proc. Natl. Acad. Sci. U. S. A.*  
547 **109**, E2846-2855 (2012).
- 548 17. Hartman, H. & Fedorov, A. The origin of the eukaryotic cell: a genomic investigation.  
549 *Proc. Natl. Acad. Sci.* **99**, 1420–1425 (2002).
- 550 18. Eme, L., Spang, A., Lombard, J., Stairs, C. & J. G. Ettema, T. *Archaea and the origin of*  
551 *eukaryotes.* **15**, (2017).
- 552 19. Spang, A. *et al.* A renewed syntrophy hypothesis for the origin of the eukaryotic cell  
553 based on comparative analysis of Asgard archaeal metabolism. *Nat. Microbiol.* **Submitted**,
- 554 20. Dombrowski, N., Teske, A. P. & Baker, B. J. Extensive metabolic versatility and  
555 redundancy in microbially diverse, dynamic Guaymas Basin hydrothermal sediments. *Nat.*  
556 *Commun.* **9:4999**, (2018).
- 557 21. McKay, L. *et al.* Thermal and geochemical influences on microbial biogeography in the  
558 hydrothermal sediments of Guaymas Basin, Gulf of California. *Environ. Microbiol. Rep.* **8**,  
559 150–161 (2016).
- 560 22. Yarza, P. *et al.* Uniting the classification of cultured and uncultured bacteria and archaea  
561 using 16S rRNA gene sequences. *Nat. Rev. Microbiol.* **12**, 635–645 (2014).
- 562 23. Lazar, C. S. *et al.* Environmental controls on intragroup diversity of the uncultured  
563 benthic archaea of the miscellaneous Crenarchaeotal group lineage naturally enriched in

- 564 anoxic sediments of the White Oak River estuary (North Carolina, USA). *Environ. Microbiol.*  
565 **17**, 2228–2238 (2015).
- 566 24. Tabita, F. R., Satagopan, S., Hanson, T. E., Kreel, N. E. & Scott, S. S. Distinct form I, II, III,  
567 and IV Rubisco proteins from the three kingdoms of life provide clues about Rubisco  
568 evolution and structure/function relationships. *J. Exp. Bot.* **59**, 1515–1524 (2007).
- 569 25. Dowell, F. *et al.* Microbial Communities in Methane- and Short Chain Alkane-Rich  
570 Hydrothermal Sediments of Guaymas Basin. *Front. Microbiol.* **7**, (2016).
- 571 26. Krukenberg, V. *et al.* Candidatus Desulfofervidus auxilii, a hydrogenotrophic sulfate-  
572 reducing bacterium involved in the thermophilic anaerobic oxidation of methane. *Environ.*  
573 *Microbiol.* **18**, 3073–3091 (2016).
- 574 27. Stams, A. J. M. & Plugge, C. M. Electron transfer in syntrophic communities of anaerobic  
575 bacteria and archaea. *Nat. Rev. Microbiol.* **7**, 568–577 (2009).
- 576 28. Meuer, J., Kuettner, H. C., Zhang, J. K., Hedderich, R. & Metcalf, W. W. Genetic analysis  
577 of the archaeon *Methanosarcina barkeri* Fusaro reveals a central role for Ech hydrogenase  
578 and ferredoxin in methanogenesis and carbon fixation. *Proc. Natl. Acad. Sci.* **99**, 5632–5637  
579 (2002).
- 580 29. Kunow, J., Linder, D., Stetter, K. O. & Thauer, R. K. F420H2: quinone oxidoreductase  
581 from *Archaeoglobus fulgidus*. *Eur. J. Biochem.* **223**, 503–511 (1994).
- 582 30. Wegener, G., Krukenberg, V., Riedel, D., Tegetmeyer, H. E. & Boetius, A. Intercellular  
583 wiring enables electron transfer between methanotrophic archaea and bacteria. *Nature* **526**,  
584 587–590 (2015).

- 585 31. McKay, L. J. *et al.* Spatial heterogeneity and underlying geochemistry of phylogenetically  
586 diverse orange and white Beggiatoa mats in Guaymas Basin hydrothermal sediments. *Deep*  
587 *Sea Res. Part Oceanogr. Res. Pap.* **67**, 21–31 (2012).
- 588 32. Meyer, S. *et al.* Microbial habitat connectivity across spatial scales and hydrothermal  
589 temperature gradients at Guaymas Basin. *Front. Microbiol.* **4**, (2013).
- 590 33. Dick, G. J. *et al.* Community-wide analysis of microbial genome sequence signatures.  
591 *Genome Biol.* **10**, R85 (2009).
- 592 34. Kang, D. D., Froula, J., Egan, R. & Wang, Z. MetaBAT, an efficient tool for accurately  
593 reconstructing single genomes from complex microbial communities. *PeerJ* **3**, e1165 (2015).
- 594 35. Alneberg, J. *et al.* Binning metagenomic contigs by coverage and composition. *Nat.*  
595 *Methods* **11**, nmeth.3103 (2014).
- 596 36. Sieber, C. M. K. *et al.* Recovery of genomes from metagenomes via a dereplication,  
597 aggregation, and scoring strategy. *bioRxiv* 107789 (2017). doi:10.1101/107789
- 598 37. Parks, D. H., Imelfort, M., Skennerton, C. T., Hugenholtz, P. & Tyson, G. W. CheckM:  
599 assessing the quality of microbial genomes recovered from isolates, single cells, and  
600 metagenomes. *Genome Res.* gr.186072.114 (2015). doi:10.1101/gr.186072.114
- 601 38. Darling, A. E. *et al.* PhyloSift: phylogenetic analysis of genomes and metagenomes. *PeerJ*  
602 **2**, e243 (2014).
- 603 39. Altschul, S. F., Gish, W., Miller, W., Myers, E. W. & Lipman, D. J. Basic local alignment  
604 search tool. *J. Mol. Biol.* **215**, 403–410 (1990).
- 605 40. Karst, S. M., Kirkegaard, R. H. & Albertsen, M. mmgenome: a toolbox for reproducible  
606 genome extraction from metagenomes. *bioRxiv* 059121 (2016). doi:10.1101/059121

- 607 41. <https://github.com/dparks1134/CompareM>.
- 608 42. Pruesse, E., Peplies, J. & Glöckner, F. O. SINA: Accurate high-throughput multiple  
609 sequence alignment of ribosomal RNA genes. *Bioinformatics* **28**, 1823–1829 (2012).
- 610 43. Kearse, M. *et al.* Geneious Basic: an integrated and extendable desktop software  
611 platform for the organization and analysis of sequence data. *Bioinforma. Oxf. Engl.* **28**, 1647–  
612 1649 (2012).
- 613 44. Altschul, S. F. *et al.* Gapped BLAST and PSI-BLAST: a new generation of protein database  
614 search programs. *Nucleic Acids Res.* **25**, 3389–3402 (1997).
- 615 45. Katoh, K. & Standley, D. M. MAFFT multiple sequence alignment software version 7:  
616 Improvements in performance and usability. *Mol. Biol. Evol.* **30**, 772–780 (2013).
- 617 46. Criscuolo, A. & Gribaldo, S. BMGE (Block Mapping and Gathering with Entropy): a new  
618 software for selection of phylogenetic informative regions from multiple sequence  
619 alignments. *BMC Evol. Biol.* **10**, 210 (2010).
- 620 47. Nguyen, L.-T., Schmidt, H. A., von Haeseler, A. & Minh, B. Q. Iq-tree: A fast and effective  
621 stochastic algorithm for estimating maximum-likelihood phylogenies. *Mol. Biol. Evol.* **32**,  
622 268–274 (2015).
- 623 48. Wang, H.-C., Minh, B. Q., Susko, E. & Roger, A. J. Modeling Site Heterogeneity with  
624 Posterior Mean Site Frequency Profiles Accelerates Accurate Phylogenomic Estimation. *Syst.*  
625 *Biol.* **syx068** (2017).
- 626 49. Jeffroy, O., Brinkmann, H., Delsuc, F. & Philippe, H. Phylogenomics: the beginning of  
627 incongruence? *Trends Genet.* **22**, 225–231 (2006).

- 628 50. Lartillot, N. & Philippe, H. Improvement of molecular phylogenetic inference and the  
629 phylogeny of Bilateria. *Philos. Trans. R. Soc. Lond. B. Biol. Sci.* **363**, 1463–72 (2008).
- 630 51. Brown, M. W. M. *et al.* Phylogenomics demonstrates that breviate flagellates are related  
631 to opisthokonts and apusomonads. *Proc. R. Soc. B Biol. Sci.* **280**, 20131755 (2013).
- 632 52. Susko, E. & Roger, A. J. On reduced amino acid alphabets for phylogenetic inference.  
633 *Mol. Biol. Evol.* **24**, 2139–2150 (2007).
- 634 53. Capella-Gutiérrez, S., Silla-Martínez, J. M. & Gabaldón, T. trimAl: a tool for automated  
635 alignment trimming in large-scale phylogenetic analyses. *Bioinforma. Oxf. Engl.* **25**, 1972–  
636 1973 (2009).
- 637 54. Minh, B. Q., Nguyen, M. A. T. & von Haeseler, A. Ultrafast approximation for  
638 phylogenetic bootstrap. *Mol. Biol. Evol.* **30**, 1188–1195 (2013).
- 639 55. Guindon, S. *et al.* New algorithms and methods to estimate maximum-likelihood  
640 phylogenies: assessing the performance of PhyML 3.0. *Syst. Biol.* **59**, 307–321 (2010).
- 641 56. Lartillot, N. & Philippe, H. A Bayesian mixture model for across-site heterogeneities in  
642 the amino-acid replacement process. *Mol. Biol. Evol.* **21**, 1095–1109 (2004).
- 643 57. Sukumaran, J. & Holder, M. T. DendroPy: a Python library for phylogenetic computing.  
644 *Bioinforma. Oxf. Engl.* **26**, 1569–1571 (2010).
- 645 58. Hyatt, D. *et al.* Prodigal: prokaryotic gene recognition and translation initiation site  
646 identification. *BMC Bioinformatics* **11**, 119 (2010).
- 647 59. Seemann, T. Prokka: rapid prokaryotic genome annotation. *Bioinforma. Oxf. Engl.* **30**,  
648 2068–2069 (2014).



- 649 60. Moriya, Y., Itoh, M., Okuda, S., Yoshizawa, A. C. & Kanehisa, M. KAAS: an automatic  
650 genome annotation and pathway reconstruction server. *Nucleic Acids Res.* **35**, W182–W185  
651 (2007).
- 652 61. Markowitz, V. M. *et al.* IMG: the integrated microbial genomes database and  
653 comparative analysis system. *Nucleic Acids Res.* **40**, D115–D122 (2012).
- 654 62. Yin, Y. *et al.* dbCAN: a web resource for automated carbohydrate-active enzyme  
655 annotation. *Nucleic Acids Res.* **40**, W445–W451 (2012).
- 656 63. Rawlings, N. D., Barrett, A. J. & Bateman, A. MEROPS: the peptidase database. *Nucleic*  
657 *Acids Res.* **38**, D227–D233 (2010).
- 658 64. Jones, P. *et al.* InterProScan 5: genome-scale protein function classification. *Bioinforma.*  
659 *Oxf. Engl.* **30**, 1236–1240 (2014).
- 660 65. Johnson, L. S., Eddy, S. R. & Portugaly, E. Hidden Markov model speed heuristic and  
661 iterative HMM search procedure. *BMC Bioinformatics* **11**, 431 (2010).
- 662 66. Anantharaman, K. *et al.* Thousands of microbial genomes shed light on interconnected  
663 biogeochemical processes in an aquifer system. *Nat. Commun.* **7**, 13219 (2016).
- 664 67. Anantharaman, K. *et al.* Thousands of microbial genomes shed light on interconnected  
665 biogeochemical processes in an aquifer system. **7**, (2016).
- 666 68. Søndergaard, D., Pedersen, C. N. S. & Greening, C. HydDB: A web tool for hydrogenase  
667 classification and analysis. *Sci. Rep.* **6**, 34212 (2016).
- 668 69. Vignais, P. M. & Billoud, B. Occurrence, classification, and biological function of  
669 hydrogenases: an overview. *Chem. Rev.* **107**, 4206–4272 (2007).

670 70. Vignais, P. M., Billoud, B. & Meyer, J. Classification and phylogeny of hydrogenases1.

671 *FEMS Microbiol. Rev.* **25**, 455–501

672 71. Makarova, K. S., Wolf, Y. I. & Koonin, E. V. Archaeal Clusters of Orthologous Genes

673 (arCOGs): An Update and Application for Analysis of Shared Features between

674 Thermococcales, Methanococcales, and Methanobacteriales. *Life* **5**, 818–840 (2015).

675

676

## 677 **Acknowledgements**

678 This study was supported in part by an Alfred P. Sloan Foundation fellowship (FG-2016-6301) and  
679 National Science Foundation Directorate of Biological Sciences (award 1737298) to BJB. Sampling  
680 in Guaymas Basin and post-cruise work was supported by NSF Awards OCE-0647633 and OCE-  
681 1357238 to APT, respectively. The work conducted by the U.S. Department of Energy Joint  
682 Genome Institute, a DOE Office of Science User Facility, is supported by the Office of Science of  
683 the U.S. Department of Energy under Contract No. DE-AC02-05CH11231 provided to ND.

684

## 685 **Author contributions**

686 KWS, TJGE, ND and BJB conceived the study. KWS, ND, and BJB analyzed the genomic data. APT  
687 collected and processed samples. KWS, AS, and LE performed phylogenetic analyses. JL analyzed  
688 ESPs. KWS, AS, JRS, APT, BJB handled the metabolic inferences. BJB and KWS wrote the  
689 manuscript with inputs from all authors.
